# Supplementary material for: The synthesis of conjugated microporous polymers via nucleophilic substitution of hydroquinone with cyanuric chloride and hexachlorocyclotriphosphazene for sensing to 2,4-dinitrophenol and 2,4,6-trinitrophenol
Source: Royal Society of Chemistry journal article supplement (doi:10.1039/d0nj06099b), 2021-01-01
Supplement: d0nj06099b1.pdf [file d0nj06099b1.pdf]

## **New journal of chemistry**

### ***Supplementary Information***

***For***

## **The synthesis of conjugated microporous polymers via nucleophilic substitution of hydroquinone with cyanuric chloride and hexachlorocyclotriphosphazene for sensing to 2,4-dinitrophenol and 2,4,6-trinitrophenol**

Tong-Mou Geng\*, Min Liu, Chen Hu, and Hai Zhu

*AnHui Province Key Laboratory of Optoelectronic and Magnetism Functional Materials;  
School of Chemistry and Chemical Engineering, Anqing Normal University, Anqing 246011,  
China*

#### **Corresponding Author:**

Tongmou Geng

Mailing Address: School of Chemistry and Chemical Engineering, Anqing Normal University,  
Anqing 246011, China

E-mail addresses: gengtongmou@aqnu.edu.cn (TM Geng).

## **S1. Experimental Section**

### **S1-1. Materials**

Hydroquinone, cyanuric chloride (CC), and triethylamine (TEA) were purchased from Aladdin. Hexachlorocyclotriphosphazene (phosphonitrilic chloride trimer, HCCP) was obtained from Shanghai Shaoyuan reagent Co., Ltd. All chemicals were used without any purification. All of the chemicals were purchased from commercial suppliers and used without further purification as commercially available unless otherwise noted. Solvents were dried and distilled following a standard procedure.

### **S 1-2. Synthesis of the CMPs**

#### **S 1-2-1. Synthesis of THQ**

Cyanuric chloride (8.0 mmol, 1.4753 g) was dissolved in 50 mL of dioxane in a 250 mL three-neck flasks. Then hydroquinone (12.0 mmol, 1.3213 g), triethylamine (TEA) (30 mmol, 4.16 mL), and dioxane (100 mL) were added to the flasks. The reaction was carried at room temperature for two hours, then refluxing at 120 °C for 5d under nitrogen protection. The reaction mixture was cooled and the solid was removed by filtration and washed with 10% Na<sub>2</sub>CO<sub>3</sub>, distilled water, ethanol, and acetic ether three times for each. The powder was then Soxhlet extracted with THF and ethanol for 24 hours for each. The brown powder was dried at 50 °C under vacuum for 24 h to give the product. Yield: 53.75 %. Elemental analysis for C<sub>25</sub>H<sub>18</sub>N<sub>6</sub>O<sub>6</sub>

calculated (%): C, 60.24; H, 3.64; N, 16.85 and found (%): C, 58.00; H, 3.408; N, 17.96.

### S 1-2-2. Synthesis of HHQ

HHQ was obtained as light brown colored powder using the same procedures. HCCP (4.0 mmol, 1.3906 g), hydroquinone (12 mmol, 1.3213 g), TEA (30 mmol, 4.16 mL), and dioxane (100 mL) (yield: 71.98 %). Elemental analysis for  $C_{21}H_{24}N_3O_3P_3$  calculated (%): C, 54.91; H, 5.27; N, 9.15 and found (%): C, 50.73; H, 4.459; N, 10.20.

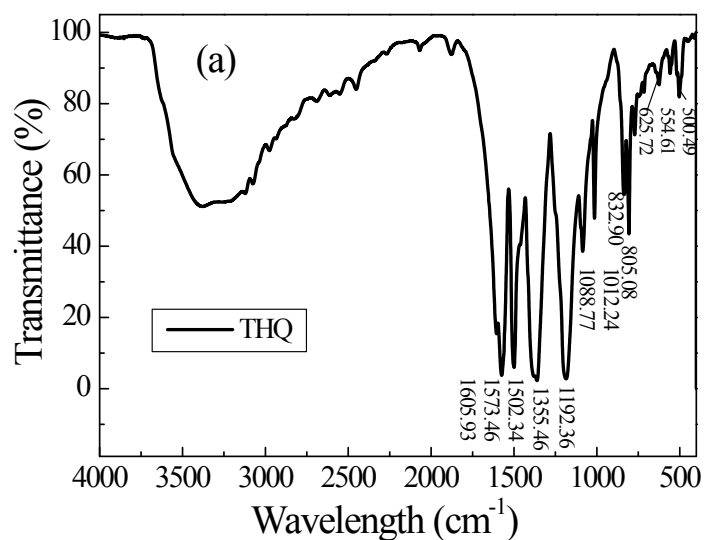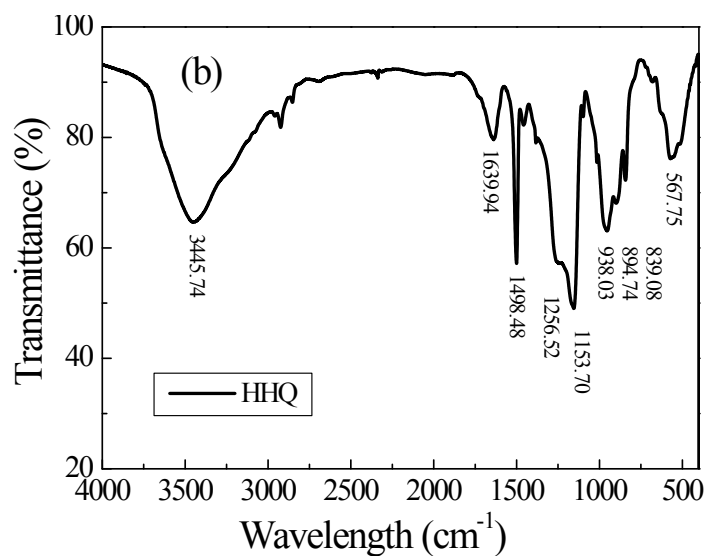

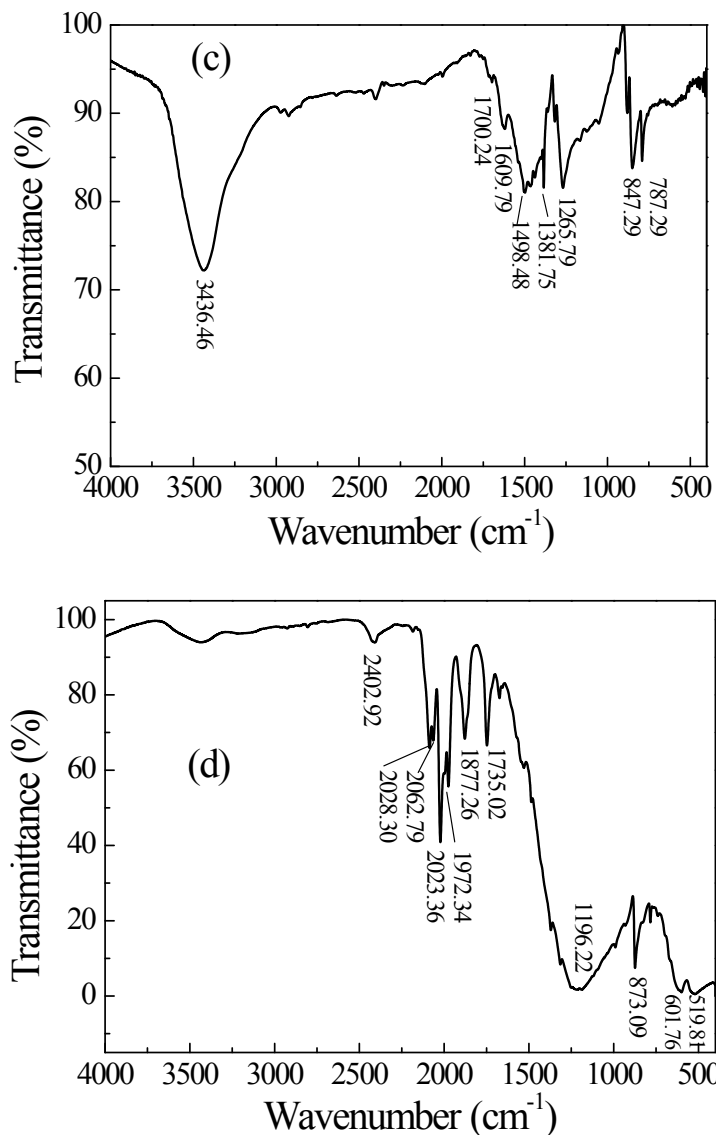

**Fig. S1.** FT-IR spectra of CMPs and monomers. (a) THQ, (b) HHQ, (c) CC, and (d) HCCP.

### S1. 3. Methods

Infrared spectra were recorded on an iS50 FT-IR spectrometer (400 to 4000 cm<sup>-1</sup>) by using KBr pellets. Solid-state <sup>13</sup>C CP/MAS NMR measurements were recorded on a Bruker AVANCE III 400 WB spectrometer at a MAS rate of 5 kHz and a CPcontact time of 2 ms. UV-Vis spectra were recorded on an UV-2501PC

spectrometer. Elemental analyses were carried out on a VARIO ELIII cube analyzer. Scanning electron microscopy was performed on a S-3400N microscope. Thermogravimetric analysis (TGA) measurements were performed on a CDR-4P TGA under N<sub>2</sub>, by heating to 800 °C at a rate of 10 °C min<sup>-1</sup>. X-ray diffraction (XRD) data were recorded on a XRD 600 diffractometer by depositing powder on glass substrate, from 2θ = 5° to 90° with 0.02° increment. The Brunauer-Emmett-Teller (BET) method was utilized to calculate specific surface area and pore volume, the Saito-Foley (SF) method was applied for estimation of pore size distribution. Fluorescence spectra were recorded at room temperature using a Hitachi F-4500 spectrophotometer. Samples were prepared as follows: dried CMPs powder (10 mg) ground with an agate mortar was added to 10 mL of organic solvents. After the resulting mixture was well dispersed with ultrasound, the dispersion colloid was obtained.

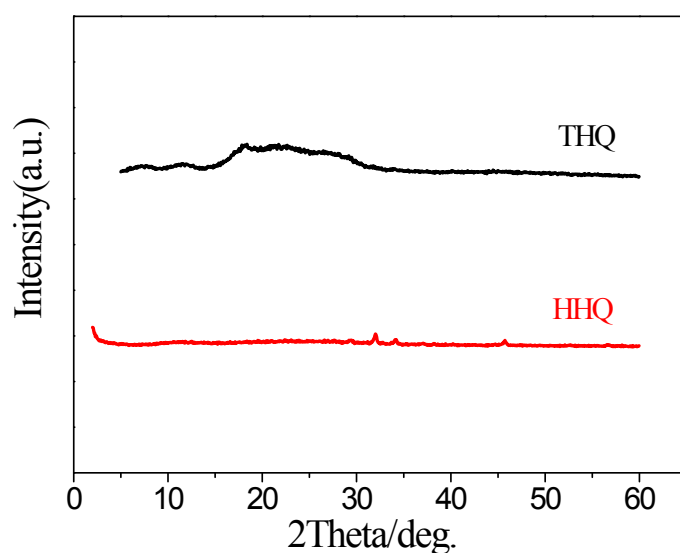

**Fig. S2.** XRD patterns of THQ (black) and HHQ (red).

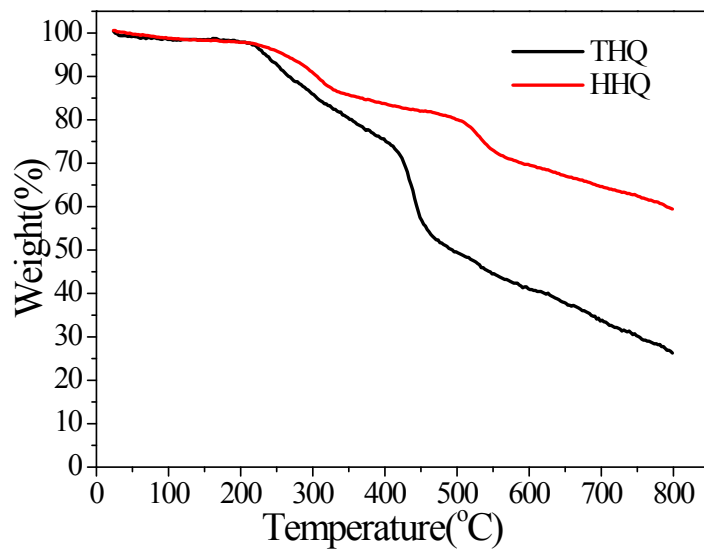

**Fig. S3.** TGA analysis data of THQ and HHQ. Data collected by heating at 10 °C min<sup>-1</sup> under a nitrogen atmosphere.

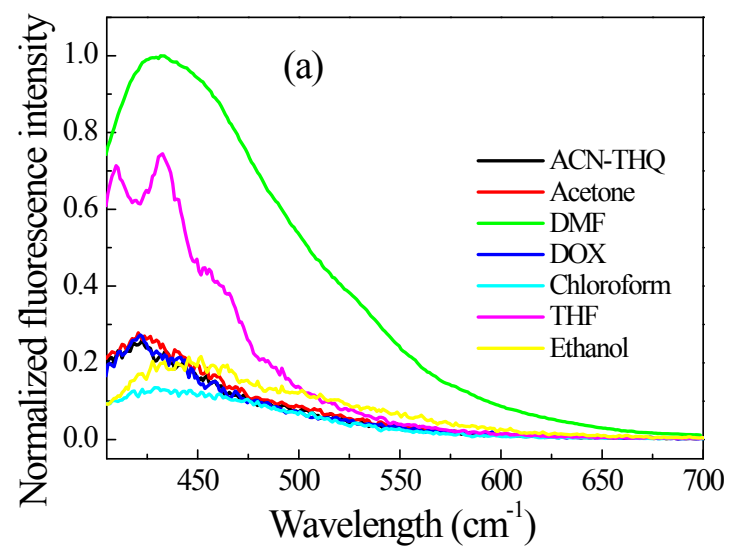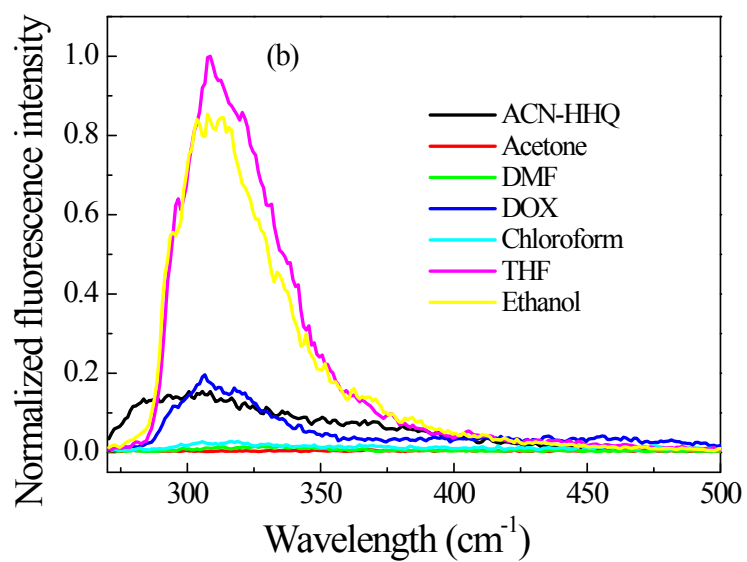

**Fig. S4.** Fluorescence spectra of (a) THQ and (b) HHQ in various solvents (1.0 mg mL<sup>-1</sup>,  $\lambda_{ex}$ =375 and 260 nm).

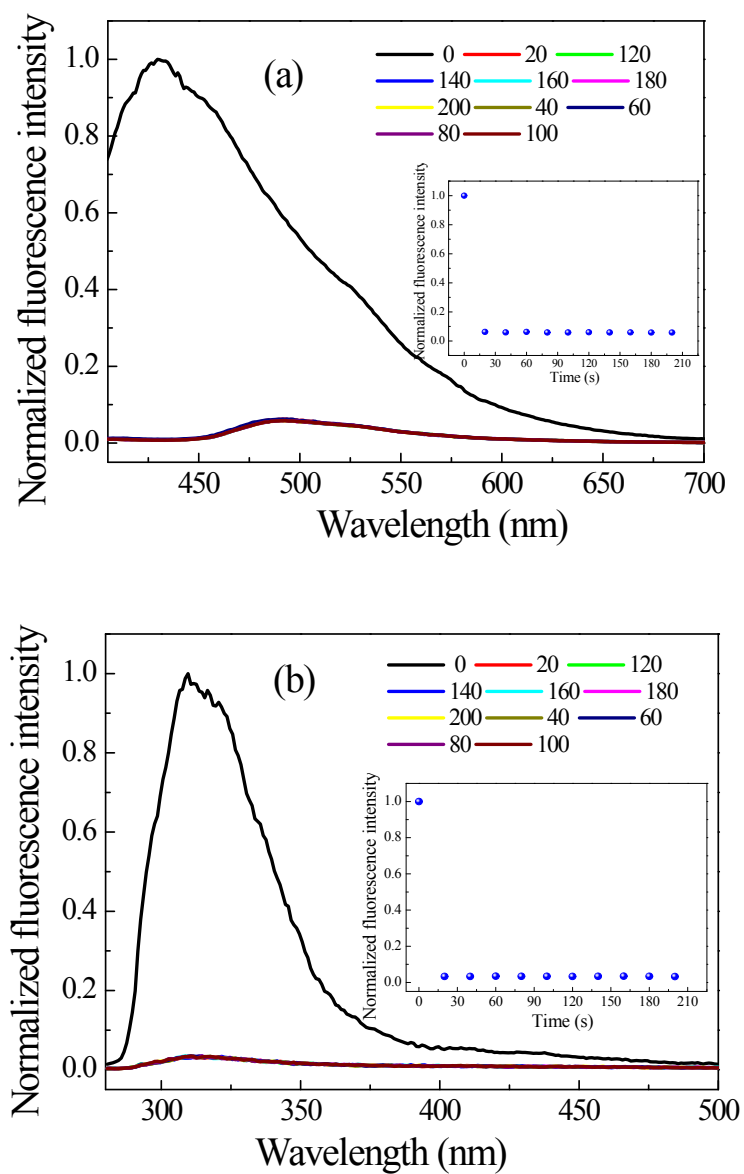

**Fig. S5.** Fluorescence spectral changes of (a) THQ dispersed in DMF (1.0 mg mL<sup>-1</sup>,  $\lambda_{ex}=375$ ) and (b) HHQ dispersed in THF (1.0 mg mL<sup>-1</sup>,  $\lambda_{ex}=260$  nm) upon addition of DNP and TNP. Inserts: the evolution of maximum fluorescence intensity as a function of time.



**S2. The detail experiment and calculation processes for limit of detections (LODs).**

**S2-1. The experiments of LODs for DNP and TNP.**

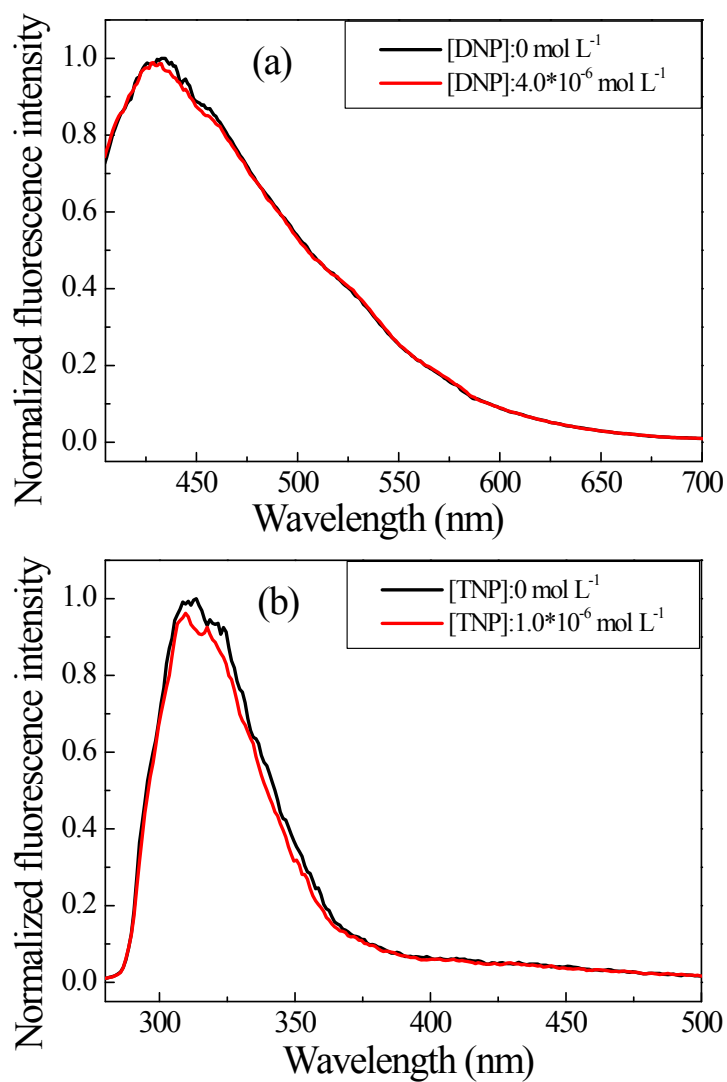

**Fig. S6.** The experiments for LODs of DNP and TNP.

**S2-2. The detail calculation processes of LODs.**

**S2-2-1. The calculation for LOD of DNP.**

The LOD of DNP: 0.1 mol L<sup>-1</sup>, 0.08 μL

$$I_0/I = 6.4969 \times 10^4 [\text{DNP}] + 1.1002, R = 0.9991, 0.1 \times 10^{-4} \text{ mol L}^{-1}$$

$$S = 0.08 \mu\text{L} \times 10^{-6} \times 0.1 / 2.0 \times 10^{-3} = 4.0 \times 10^{-6} \text{ mol L}^{-1}$$

$$\text{LOD} = 3S/\rho = 3 \times 4.0 \times 10^{-6} / 6.4964 \times 10^4 = 1.85 \times 10^{-10} \text{ mol L}^{-1}$$

**S2-2-2. The calculation for LOD of TNP.**

The LOD of TNP:  $0.1 \text{ mol L}^{-1}$ ,  $0.02 \mu\text{L}$

$$I_0/I = 23.037 \times 10^4 [\text{TNP}] - 0.1985, R = 0.9940, 0.5 \times 10^{-5} \text{ mol L}^{-1}$$

$$S = 0.02 \mu\text{L} \times 10^{-6} \times 0.1 / 2.0 \times 10^{-3} = 1.0 \times 10^{-6} \text{ mol L}^{-1}$$

$$\text{LOD} = 3S/\rho = 3 \times 1.0 \times 10^{-6} / 23.037 \times 10^4 = 1.30 \times 10^{-11} \text{ mol L}^{-1}$$

**Table S1.** Summary of  $K_{sv}$  and LODs of other materials for the determination of

## DNP.

| materials                 | BET<br>(m <sup>2</sup> g <sup>-1</sup> ) | Methods or<br>K <sub>sv</sub> (L mol <sup>-1</sup> ) | LODs<br>(mol L <sup>-1</sup> )                        | Refs                                                          |
|---------------------------|------------------------------------------|------------------------------------------------------|-------------------------------------------------------|---------------------------------------------------------------|
| -                         | -                                        | SPE and UHPLC<br>-QTR AP® MS                         | 1.85×10 <sup>-10</sup><br>(34 ng/l)                   | <i>Anal. Bioanal. Chem.</i> , 2013,<br>405, 5875–5885.        |
| SBA-15 CMK-3              | 660<br>1400                              | CMK-3-GC<br>-MS method                               | 1.09×10 <sup>-8</sup><br>(0.002 µg mL <sup>-1</sup> ) | <i>Anal. Chim. Acta</i> , 2011, 695,<br>58–62.                |
| GO-MIP/GCE<br>composites  | -                                        | electrochemical<br>sensor                            | 4×10 <sup>-7</sup><br>(0.4 µM)                        | <i>Sensor. Actuat. B-Chem.</i> ,<br>2012, 171–172, 1151–1158. |
| SPE-MIPs                  | -                                        | fluorescence<br>detection                            | 1×10 <sup>-9</sup><br>(1 nmol L <sup>-1</sup> )       | <i>Chinese Chem. Lett.</i> , 2014,<br>25, 1492–149.           |
| Dialysed caramel          | -                                        | fluorescence<br>detection                            | 1.4×10 <sup>-7</sup><br>(0.14µM)                      | <i>Talanta</i> , 2019, 197, 159–<br>167.                      |
| MOFs                      | -                                        | -                                                    | -                                                     | <i>J. Mater. Chem. A</i><br>2015, 3, 22369–22376.             |
| proximate pyrene<br>units | -                                        | fluorescence<br>detection 1×10 <sup>4</sup>          | -                                                     | <i>Tetrahedron Lett.</i> , 2015,56,<br>2311–2314.             |
| TTPTh                     | 564.97                                   | 1.10×10 <sup>4</sup>                                 | 5.47×10 <sup>-10</sup>                                | <i>New J. Chem.</i> , 2020, 44,<br>19663-19671.               |
| DBTh                      | 416.99                                   | 5.76×10 <sup>4</sup>                                 | 1.56×10 <sup>-10</sup>                                |                                                               |
| TBTh                      | 521.30                                   | 9.59×10 <sup>3</sup>                                 | 9.38×10 <sup>-9</sup>                                 |                                                               |
| COF-BABD-DB               | 568.6                                    | 9.59×10 <sup>3</sup>                                 | -                                                     | <i>Chem. Commun.</i> , 2018, 54,<br>2308-2311.                |
| COF-BABD-BZ               | 750.5                                    | 1.50×10 <sup>4</sup>                                 | -                                                     |                                                               |

|     |       |                    |                        |                   |
|-----|-------|--------------------|------------------------|-------------------|
| THQ | 71.55 | $3.20 \times 10^4$ | $1.85 \times 10^{-10}$ | <i>This work.</i> |
|-----|-------|--------------------|------------------------|-------------------|

**Table S2.** Summary of  $K_{sv}$  and LODs of other CMPs for the determination of TNP.

| materials                        | BET<br>( $m^2 g^{-1}$ ) | Methods or<br>$K_{sv}$ ( $L mol^{-1}$ ) | LODs<br>( $mol L^{-1}$ ) | Refs                                                 |
|----------------------------------|-------------------------|-----------------------------------------|--------------------------|------------------------------------------------------|
| TDPDB                            | 592.18                  | $1.55 \times 10^4$                      | $1.93 \times 10^{-11}$   | <i>Polym. Adv. Technol.</i> 2020, 31(6), 1388–1394.  |
| CK-CMP                           | -                       | $9.9 \times 10^4$                       | -                        | <i>Inorg. Chem. Comm.</i> , 2019, 107, 107453        |
| <sup>i</sup> PrTAPB -Azo-<br>COP | 395                     | $1.1 \times 10^4$                       | -                        | <i>J. Chem. Sci.</i> , 2018. 130(1), 1-14.           |
| HPP-2                            | 747                     | $2.41 \times 10^4$                      | 17.67 ppb                | <i>Sensor. Actuat. B-Chem.</i> , 2018, 265, 476–487. |
| CMP-LS1                          | 493                     | $5.05 \times 10^4$                      | -                        | <i>New J. Chem.</i> , 2018, 42, 9482–9487.           |
| CMP-LS2                          | 1576                    | $3.70 \times 10^4$                      | -                        |                                                      |
| PNT-4                            | 1311.54                 | $6.22 \times 10^5$                      | $2.36 \times 10^{-9}$    | <i>Sensor. Actuat. B-Chem.</i> , 2018, 274, 102–109. |
| PNT-5                            | 817.32                  | $5.08 \times 10^5$                      | $3.12 \times 10^{-9}$    |                                                      |
| PNT-6                            | 433.24                  | $2.38 \times 10^5$                      | $5.52 \times 10^{-9}$    |                                                      |
| COP-612                          | 48.80                   | $2.51 \times 10^5$                      | -                        | <i>Sensor. Actuat. B-Chem.</i> , 2017, 243, 753–760. |
| DTF                              | 705.27                  | $2.08 \times 10^3$                      | $7.22 \times 10^{-7}$    | <i>Talanta</i> , 2017, 165, 282–                     |
| PTPATTh                          | 594                     | $5.00 \times 10^3$                      | $3.01 \times 10^{-9}$    | 288.                                                 |
| PTPATCz                          | 894                     | $4.28 \times 10^3$                      | $7.01 \times 10^{-9}$    | <i>Sensor. Actuat. B-Chem.</i> ,                     |

|                |        |                    |                        |                                                                                       |
|----------------|--------|--------------------|------------------------|---------------------------------------------------------------------------------------|
| TTPB           | 222.25 | $1.29 \times 10^3$ | $8.14 \times 10^{-9}$  | <i>2017, 244, 334–343</i><br><i>J. Mater. Chem. A., 2017, 5,</i><br><i>7612–7617.</i> |
| DCZP           | 688    | $3.94 \times 10^3$ | -                      | <i>J Mater Sci.,</i><br><i>2016, 51, 4104–4114.</i>                                   |
| DCZN           | 97     | $6.63 \times 10^3$ | -                      | <i>Micropor. Mesopor. Mater.,</i><br><i>2016, 231, 92–99.</i>                         |
| DBQP           | 355.76 | $9.02 \times 10^4$ | $3.33 \times 10^{-13}$ | <i>J. Mater. Chem. A, 2015, 3,</i><br><i>92–96</i>                                    |
| DBQN           | 25.48  | $1.79 \times 10^4$ | $2.48 \times 10^{-13}$ | <i>J. Mater. Chem. C, 2015, 3,</i><br><i>6876–6881</i>                                |
| COP-401        | -      | $8.3 \times 10^4$  | -                      | <i>Angew. Chem. Int. Ed. 2015,</i><br><i>54, 11540–11544</i>                          |
| COP-301        | -      | $2.6 \times 10^5$  | -                      | <i>J. Mater. Chem. C, 2015, 3,</i><br><i>8490–8494</i>                                |
| FL-SNWDPP      | 750    | $5.3 \times 10^4$  | -                      | <i>Polym. Chem., 2015, 6,</i><br><i>3775–3780.</i>                                    |
| -0.11          |        |                    |                        | <i>Macromol. Rapid Commun.</i><br><i>2012, 33, 1184–1190.</i>                         |
| polyTPECz film | 1020   | $6.4 \times 10^4$  |                        |                                                                                       |
| COP-61         | 1302   | $2.40 \times 10^5$ | 1 ppm                  |                                                                                       |
| COP-62         | 1208   | $1.82 \times 10^5$ | 1 ppm                  |                                                                                       |
| COP-63         | 931    | $8.04 \times 10^4$ | 1 ppm                  |                                                                                       |
| COP-64         | 716    | $9.79 \times 10^4$ | 1 ppm                  |                                                                                       |
| COP-65         | 869    | $6.80 \times 10^4$ | 1 ppm                  |                                                                                       |
| P2             | 39     | $2.1 \times 10^3$  | -                      |                                                                                       |
| P3             | 143    | $7.6 \times 10^4$  | -                      |                                                                                       |
| COP-3          | 1869   | $1.45 \times 10^4$ | -                      |                                                                                       |
| COP-4          | 2015   | $3.93 \times 10^3$ | -                      |                                                                                       |
| HHQ            | 24.16  | $2.30 \times 10^5$ | $1.30 \times 10^{-11}$ |                                                                                       |

---

*This work.*

---
